# Supplementary material for: Preferential Localization of Human Origins of DNA Replication at the 5′-Ends of Expressed Genes and at Evolutionarily Conserved DNA Sequences
Source: PubMed Central journal article supplement (PMC3094316; doi:10.1371/journal.pone.0017308), 2011-05-13
Supplement: pone.0017308.s013.pdf [file pone.0017308.s013.pdf]

**Table S1.** Tiling array coverage (UCSC hg16 genome)

| <b>Chromosome</b>             | <b>Genomic Position</b>   | <b>Size (MB)</b> | <b>Region covered</b>     |
|-------------------------------|---------------------------|------------------|---------------------------|
| chr2                          | 210,973,598 - 211,173,420 | 0.2              | RPE origin region         |
| chr3                          | 176,319,908 - 176,612,994 | 0.3              | AC08180                   |
|                               | 180,000,076 - 183,000,018 | 3                | Normal region             |
|                               | 190,946,333 - 191,140,476 | 0.2              | AC016966                  |
| chr8                          | 128,567,328 - 128,815,284 | 0.2              | c-myc origin region       |
| chr11                         | 4,688,730 - 5,790,319     | 1                | beta-globin origin region |
|                               |                           |                  | ENm009                    |
| chr17                         | 10,750,045 - 15,049,992   | 4.3              | MCF7 normal region        |
|                               | 56,950,057 - 61,049,966   | 4.1              | MCF7 High-gain region     |
| chr19                         | 2,329,235 - 2,445,509     | 0.1              | Lamin B2 origin region    |
| chr20                         | 42,000,033 - 62,329,039   | 20.3             | MCF7 gain region          |
| <b>Total genomic coverage</b> |                           | <b>33.5</b>      |                           |

**Table S2.** Validation Primer Pairs

| Chrom | start    | end      | Notes  | Strand | Left Primer           | Right Primer            |
|-------|----------|----------|--------|--------|-----------------------|-------------------------|
| chr17 | 60019269 | 60019392 | trough | +      | AGCCCCTGGAGTAATCACCT  | TGTCAGCTTCAGCTTCTGGA    |
| chr17 | 60020455 | 60020679 | p1     | +      | TCGCTTCTGAGTCATTGGTG  | TTGGGTAGGAGTTGACTGGG    |
| chr17 | 60021650 | 60021884 | p2     | +      | CCCTTCTTGGCTTCTCAGTG  | TGAGCTCTCAACTGCCCTT     |
| chr17 | 60022230 | 60022330 | p3     | +      | CTGTCCTGTATGGCACATGG  | TCTGCTGTGAAGGCTTTCCT    |
| chr17 | 60023316 | 60023558 | trough | +      | GCAACCATGGCTACCAATTT  | CCAAGATCACACCATTGCAC    |
| chr17 | 60024230 | 60024380 | trough | +      | ATTCCTCTCCTGCGAACTG   | CAATCAAAAGCATCGGTGTG    |
| chr17 | 60025225 | 60025291 | trough | +      | CTCCTGAAGGGGGTGGTAAT  | AATAGCTCTGGGTCCCCACT    |
| chr17 | 60026075 | 60026243 | p4     | +      | GCTGACCCAAGTCCCTTACA  | TGAGATCATTCGTGTCCAGC    |
| chr17 | 60027449 | 60027556 | trough | +      | GATGATACCCAGGGCTTTGA  | GCTGAGAGAACCCAGGACAG    |
| chr17 | 60028604 | 60028769 | p5     | +      | ATGGAGTCACCCAGCTCAAC  | CCAGAGTGCCAAGAGAAAAGG   |
| chr17 | 60028838 | 60028951 | trough | +      | CGTCAGTACCAGGTCCCATC  | AACCCCTCGGTTTCTGTCT     |
| chr17 | 60030072 | 60030153 | trough | +      | TGCTGACAGCTCACAATTCC  | CCCTCCTTGATGTGACCAGT    |
| chr17 | 60060940 | 60061152 | trough | +      | TGTTACCTGGGGGCAGATAC  | CGGGCAACACTGCTAGACTC    |
| chr17 | 60061644 | 60061821 | trough | +      | TTCTAGCCTGTGTTTTGGG   | CACAAATCCATTCCAAAGGG    |
| chr17 | 60062496 | 60062586 | trough | +      | AGCTTCTTGCCACGTCAGAT  | CTCACTGGTCACTGAGGCTG    |
| chr17 | 60062928 | 60063099 | p6     | +      | GCCTCCAGTTGGAAATTGAA  | GCCTCTGTGAATGTGCAGAA    |
| chr17 | 60063246 | 60063447 | trough | +      | TCCATTTTTGAGCACACAGC  | GGCCCCAAAAGTAAAGAAAGC   |
| chr17 | 60064593 | 60064676 | trough | +      | TCAGAGCACCCCTCTAAGGA  | AATCAGGACGTGGTTCAAGC    |
| chr17 | 60066475 | 60066605 | trough | +      | CGAAGGACTGCAATCACAGA  | CTCCTGGTCCGACTCTTTTG    |
| chr17 | 60068988 | 60069169 | trough | +      | TGGGCCTCTGCATTAATTTTC | GTCAGCAGACCTGTGTTGGA    |
| chr17 | 60069823 | 60069935 | trough | +      | TGACTGAGAGTGGGCCTCAT  | GCTGTTATCTGGCCTGGGTA    |
| chr17 | 60070520 | 60070658 | p7     | +      | ATCTGTGGACTGCAGAAGCA  | CTTCGCTTCTCTGGTCAGGT    |
| chr17 | 60072485 | 60072723 | trough | +      | TCCCAAAGTGCAGGGATTAC  | GGCAACATTAATCCGGACAG    |
| chr17 | 60074959 | 60075134 | trough | +      | GAAGCACCATCAAACCTGGGT | CTCACAAGTGCCTGGGATT     |
| chr17 | 60076463 | 60076666 | p8     | +      | AGCTGCTACTCTGGGCACAT  | AAATTTGGTGCCGTGAGTTC    |
| chr17 | 60077246 | 60077397 | p9     | +      | AGACCAGGACTCCAAACGTG  | AATCCAAAGCCCCAGAGATT    |
| chr17 | 60078485 | 60078666 | p10    | +      | AGAAGGGCAGACGTACAGGA  | GCCAGACTCGGCAAATAAAA    |
| chr17 | 60079458 | 60079552 | trough | +      | ACATGATGAAACCCAGCTC   | GCAACCTCTGTCTCTCTGGC    |
| chr17 | 60081756 | 60081959 | trough | +      | TCTGCAAATCAGAGAGGGCT  | TTTTGGCAGGACAAAGTTCC    |
| chr17 | 60083280 | 60083533 | trough | +      | TCCGTTACAGGAAATTCAA   | TTCCAATCCGCTAGATGAGG    |
| chr17 | 60084166 | 60084236 | p11    | +      | TTGAGTATCCCCTTAACCG   | AGATGATTTCCCTCTCGGGT    |
| chr17 | 60085224 | 60085301 | trough | +      | CACCCTAATGGGACGTGGTA  | ATGGAATAGAGCCAAAGCGA    |
| chr17 | 60086051 | 60086214 | p12    | +      | CCTTCGTCCCAGACAATGTT  | TGAACCTGTGAGAAGCAACG    |
| chr17 | 60086929 | 60087094 | trough | +      | ATGGTTTGGGGGCTAAAAAG  | CAGTGCATGAGAGTGCCAGT    |
| chr17 | 60087340 | 60087506 | trough | +      | ACCTCAACAAGGGATTGGTT  | TGACCATTTCCCTAGCACA     |
| chr17 | 60088854 | 60089057 | p13    | +      | CCACACCCTTCCAAGATGT   | TGAAGATGTTTACTCCAGCATTG |
| chr17 | 60092094 | 60092192 | trough | +      | GCCTTGCCAGCATTTGTTAT  | CAGCCAACAAGCGTATGAGA    |
| chr17 | 60092502 | 60092662 | trough | +      | ATTCTTTGGCAAGGCTGATG  | TGGGGAAAGGACTCCCTAGT    |

| Gene        | Known Origin Position (bp) |                           |             | Nearest Peak | distance | Publication                                        |
|-------------|----------------------------|---------------------------|-------------|--------------|----------|----------------------------------------------------|
|             | Chromosome                 | Left - Right              | Center      |              |          |                                                    |
| c-myc       | chr8                       | 128,702,651-128,704,468   | 128,703,560 |              | 0*       | Liu, <i>et al</i> , 2003                           |
| Beta-Globin | chr11                      | 5,233,697 – 5,233,852     | 5,233,290   | 5,233,790    | 500      | Aladjem, et al 1998                                |
| Lamin B2    | chr19                      | 2,379,022 – 2,379,307     | 2,379,165   |              | 0*       | [Abdurashidova, et al, 2000]<br>[Liu, et al, 2003] |
| RPE         | chr2                       | 211,085,356 – 211,086,497 | 211,085,927 |              | 0*       | [Hu, et al, 2004]                                  |

\* The center of origin is in the middle of a broad peak.

Table S3.

| <b>Sample Name</b> | <b>total # of peaks</b> | <b># of peaks</b><br>(peak-to-trough ratio $\geq 1.0$ ) | <b>FDR</b><br>(%) | <b>Median distance</b><br>(kbp) |
|--------------------|-------------------------|---------------------------------------------------------|-------------------|---------------------------------|
| 1 MCF7-NS29        | 15,686                  | 8,096                                                   | 2.3%              | 3.05                            |
| 2 MCF7-NS29A       | 16,800                  | 9,083                                                   | 3.1%              | 2.80                            |
| 3 MCF7-Self Hyb    | 15,932                  | 6                                                       | NA                | 2.6 Mbp                         |
| 4 MCF7-E14NS24     | 18,018                  | 10,245                                                  | 2.4%              | 2.44                            |
| 5 MCF7-E12NS23     | 14,256                  | 5,103                                                   | < 1%              | 3.20                            |
| 6 MCF7-NS29Afr18   | 13,665                  | 3,724                                                   | < 1%              | 6.55                            |
| 7 MCF7-NS29Afr28   | 13,893                  | 192                                                     | < 1%              | 36.70                           |
| 8 BT474-NS50       | 15,048                  | 4,432                                                   | 8%                | 4.57                            |
| 9 H520-NS55        | 14,684                  | 3,551                                                   | 2.7%              | 3.80                            |
| 10 H520-NS58       | 15,992                  | 3,619                                                   | 3.4%              | 3.60                            |
| 11 MCF7 averaged   | 16,529                  | 8,281                                                   | 0.8%              | 2.95                            |
| 12 H520 averaged   | 15,896                  | 3,201                                                   | 1%                | 3.87                            |

**Table S4.**

| <i>Cell Line</i>                | <i>G1</i> | <i>S</i> | <i>G2/M</i> |
|---------------------------------|-----------|----------|-------------|
| MCF-7 Asynchronous              | 68.6 %    | 22.9%    | 9.4%        |
| MCF-7 Asynchronous Lambda-exo   | 58%       | 37.6%    | 4.5%        |
| MCF-7 Asynchronous Lambda-exo   | 73.6%     | 21.4%    | 5%          |
| MCF-7 Synchronous 12 hr-release | 70%       | 13.4%    | 5.9%        |
| MCF-7 Synchronous 14hr-release  | 66.9%     | 15.8%    | 4.6%        |
| BT-474 Asynchronous             | 55.1%     | 27%      | 11.8%       |
| H520 Asynchronous               | 43.8%     | 37.2%    | 19.1%       |
| H520 Asynchronous               | 38.4%     | 36.2%    | 25.5%       |

TableS5

## **Legends.**

**S1. Chromosomal coverage of custom array DNA used in our study (based on hg16 genome).** Copy number features in the regions covered refer to the MCF-7 cell line only.

**S2. Primer sets used to validate array profiles by real time PCR.**

**S3. Concordance of array positioning of origin peaks with the location of four previously described origins of DNA replication (c-myc,  $\beta$ -globin, Lamin B2, and RPE respectively).**

**S4. Mean peak-to-peak distance for all cell lines used in this study, at peak to trough height of at least 1.0 (log<sub>2</sub>-ratio) and a Savitzky-Golay smoothing window size of 500 bp (see Statistical Methods Supplement).** NA in the FDR column means that no peaks were detected, while FDR denoted with the (<) sign indicates than an insufficient count of peaks (less than 10) were detected from random simulation. Samples 11 and 12 represent averaged results reported in the main text.

**S5. Percentage distribution in each cell cycle phase (G1, S, and G2/M) in asynchronous cultures of all cancer cell lines used in this study.**

**Table S1.** Tiling array coverage (UCSC hg16 genome)

| <b>Chromosome</b>             | <b>Genomic Position</b>   | <b>Size (MB)</b> | <b>Region covered</b>     |
|-------------------------------|---------------------------|------------------|---------------------------|
| chr2                          | 210,973,598 - 211,173,420 | 0.2              | RPE origin region         |
| chr3                          | 176,319,908 - 176,612,994 | 0.3              | AC08180                   |
|                               | 180,000,076 - 183,000,018 | 3                | Normal region             |
|                               | 190,946,333 - 191,140,476 | 0.2              | AC016966                  |
| chr8                          | 128,567,328 - 128,815,284 | 0.2              | c-myc origin region       |
| chr11                         | 4,688,730 - 5,790,319     | 1                | beta-globin origin region |
|                               |                           |                  | ENm009                    |
| chr17                         | 10,750,045 - 15,049,992   | 4.3              | MCF7 normal region        |
|                               | 56,950,057 - 61,049,966   | 4.1              | MCF7 High-gain region     |
| chr19                         | 2,329,235 - 2,445,509     | 0.1              | Lamin B2 origin region    |
| chr20                         | 42,000,033 - 62,329,039   | 20.3             | MCF7 gain region          |
| <b>Total genomic coverage</b> |                           | <b>33.5</b>      |                           |

**Table S2.** Validation Primer Pairs

| Chrom | start    | end      | Notes  | Strand | Left Primer           | Right Primer            |
|-------|----------|----------|--------|--------|-----------------------|-------------------------|
| chr17 | 60019269 | 60019392 | trough | +      | AGCCCCTGGAGTAATCACCT  | TGTCAGCTTCAGCTTCTGGA    |
| chr17 | 60020455 | 60020679 | p1     | +      | TCGCTTCTGAGTCATTGGTG  | TTGGGTAGGAGTTGACTGGG    |
| chr17 | 60021650 | 60021884 | p2     | +      | CCCTTCTTGGCTTCTCAGTG  | TGAGCTCTCAACTGCCCTT     |
| chr17 | 60022230 | 60022330 | p3     | +      | CTGTCCTGTATGGCACATGG  | TCTGCTGTGAAGGCTTTCCT    |
| chr17 | 60023316 | 60023558 | trough | +      | GCAACCATGGCTACCAATTT  | CCAAGATCACACCATTGCAC    |
| chr17 | 60024230 | 60024380 | trough | +      | ATTCCTCTCCTGCGAACTG   | CAATCAAAAGCATCGGTGTG    |
| chr17 | 60025225 | 60025291 | trough | +      | CTCCTGAAGGGGGTGGTAAT  | AATAGCTCTGGGTCCCCACT    |
| chr17 | 60026075 | 60026243 | p4     | +      | GCTGACCCAAGTCCCTTACA  | TGAGATCATTCGTGTCCAGC    |
| chr17 | 60027449 | 60027556 | trough | +      | GATGATACCCAGGGCTTTGA  | GCTGAGAGAACCCAGGACAG    |
| chr17 | 60028604 | 60028769 | p5     | +      | ATGGAGTCACCCAGCTCAAC  | CCAGAGTGCCAAGAGAAAAGG   |
| chr17 | 60028838 | 60028951 | trough | +      | CGTCAGTACCAGGTCCCATC  | AACCCCTCGGTTTCTGTCT     |
| chr17 | 60030072 | 60030153 | trough | +      | TGCTGACAGCTCACAATTCC  | CCCTCCTTGATGTGACCAGT    |
| chr17 | 60060940 | 60061152 | trough | +      | TGTTACCTGGGGGCAGATAC  | CGGGCAAACTGCTAGACTC     |
| chr17 | 60061644 | 60061821 | trough | +      | TTCTAGCCTGTGTTTTGGG   | CACAAATCCATTCCAAAGGG    |
| chr17 | 60062496 | 60062586 | trough | +      | AGCTTCTTGCCACGTCAGAT  | CTCACTGGTCACTGAGGCTG    |
| chr17 | 60062928 | 60063099 | p6     | +      | GCCTCCAGTTGGAAATTGAA  | GCCTCTGTGAATGTGCAGAA    |
| chr17 | 60063246 | 60063447 | trough | +      | TCCATTTTTGAGCACACAGC  | GGCCCCAAAAGTAAAGAAAGC   |
| chr17 | 60064593 | 60064676 | trough | +      | TCAGAGCACCCCTCTAAGGA  | AATCAGGACGTGGTTCAAGC    |
| chr17 | 60066475 | 60066605 | trough | +      | CGAAGGACTGCAATCACAGA  | CTCCTGGTCCGACTCTTTTG    |
| chr17 | 60068988 | 60069169 | trough | +      | TGGGCCTCTGCATTAATTTTC | GTCAGCAGACCTGTGTTGGA    |
| chr17 | 60069823 | 60069935 | trough | +      | TGACTGAGAGTGGGCCTCAT  | GCTGTTATCTGGCCTGGGTA    |
| chr17 | 60070520 | 60070658 | p7     | +      | ATCTGTGGACTGCAGAAGCA  | CTTCGCTTCTCTGGTCAGGT    |
| chr17 | 60072485 | 60072723 | trough | +      | TCCCAAAGTGCAGGGATTAC  | GGCAACATTAATCCGGACAG    |
| chr17 | 60074959 | 60075134 | trough | +      | GAAGCACCATCAAACCTGGGT | CTCACAAAGTGCCTGGGATT    |
| chr17 | 60076463 | 60076666 | p8     | +      | AGCTGCTACTCTGGGCACAT  | AAATTTGGTGCCGTGAGTTC    |
| chr17 | 60077246 | 60077397 | p9     | +      | AGACCAGGACTCCAAACGTG  | AATCCAAAGCCCCAGAGATT    |
| chr17 | 60078485 | 60078666 | p10    | +      | AGAAGGGCAGACGTACAGGA  | GCCAGACTCGGCAAATAAAA    |
| chr17 | 60079458 | 60079552 | trough | +      | ACATGATGAAACCCAGCTC   | GCAACCTCTGTCTCTCTGGC    |
| chr17 | 60081756 | 60081959 | trough | +      | TCTGCAAATCAGAGAGGGCT  | TTTTGGCAGGACAAAGTTCC    |
| chr17 | 60083280 | 60083533 | trough | +      | TCCGTTACAGGAAATTCAA   | TTCCAATCCGCTAGATGAGG    |
| chr17 | 60084166 | 60084236 | p11    | +      | TTGCAGTATCCCCTTAACCG  | AGATGATTTCCCTCTCGGGT    |
| chr17 | 60085224 | 60085301 | trough | +      | CACCCTAATGGGACGTGGTA  | ATGGAATAGAGCCAAAGCGA    |
| chr17 | 60086051 | 60086214 | p12    | +      | CCTTCGTCCCAGACAATGTT  | TGAACCTGTGAGAAGCAACG    |
| chr17 | 60086929 | 60087094 | trough | +      | ATGGTTTGGGGGCTAAAAAG  | CAGTGCATGAGAGTGCCAGT    |
| chr17 | 60087340 | 60087506 | trough | +      | ACCTCAACAAGGGATTGGTT  | TGACCATTTCCCTAGCACA     |
| chr17 | 60088854 | 60089057 | p13    | +      | CCACACCCTTTCCAAGATGT  | TGAAGATGTTTACTCCAGCATTG |
| chr17 | 60092094 | 60092192 | trough | +      | GCCTTGCCAGCATTTGTTAT  | CAGCCAACAAGCGTATGAGA    |
| chr17 | 60092502 | 60092662 | trough | +      | ATTCTTTGGCAAGGCTGATG  | TGGGGAAAGGACTCCCTAGT    |



| Gene        | Known Origin Position (bp) |                           |             | Nearest Peak | distance | Publication                                        |
|-------------|----------------------------|---------------------------|-------------|--------------|----------|----------------------------------------------------|
|             | Chromosome                 | Left - Right              | Center      |              |          |                                                    |
| c-myc       | chr8                       | 128,702,651-128,704,468   | 128,703,560 |              | 0*       | Liu, <i>et al</i> , 2003                           |
| Beta-Globin | chr11                      | 5,233,697 – 5,233,852     | 5,233,290   | 5,233,790    | 500      | Aladjem, et al 1998                                |
| Lamin B2    | chr19                      | 2,379,022 – 2,379,307     | 2,379,165   |              | 0*       | [Abdurashidova, et al, 2000]<br>[Liu, et al, 2003] |
| RPE         | chr2                       | 211,085,356 – 211,086,497 | 211,085,927 |              | 0*       | [Hu, et al, 2004]                                  |

\* The center of origin is in the middle of a broad peak.

Table S3.

| <b>Sample Name</b> | <b>total # of peaks</b> | <b># of peaks</b><br>(peak-to-trough ratio $\geq 1.0$ ) | <b>FDR</b><br>(%) | <b>Median distance</b><br>(kbp) |
|--------------------|-------------------------|---------------------------------------------------------|-------------------|---------------------------------|
| 1 MCF7-NS29        | 15,686                  | 8,096                                                   | 2.3%              | 3.05                            |
| 2 MCF7-NS29A       | 16,800                  | 9,083                                                   | 3.1%              | 2.80                            |
| 3 MCF7-Self Hyb    | 15,932                  | 6                                                       | NA                | 2.6 Mbp                         |
| 4 MCF7-E14NS24     | 18,018                  | 10,245                                                  | 2.4%              | 2.44                            |
| 5 MCF7-E12NS23     | 14,256                  | 5,103                                                   | < 1%              | 3.20                            |
| 6 MCF7-NS29Afr18   | 13,665                  | 3,724                                                   | < 1%              | 6.55                            |
| 7 MCF7-NS29Afr28   | 13,893                  | 192                                                     | < 1%              | 36.70                           |
| 8 BT474-NS50       | 15,048                  | 4,432                                                   | 8%                | 4.57                            |
| 9 H520-NS55        | 14,684                  | 3,551                                                   | 2.7%              | 3.80                            |
| 10 H520-NS58       | 15,992                  | 3,619                                                   | 3.4%              | 3.60                            |
| 11 MCF7 averaged   | 16,529                  | 8,281                                                   | 0.8%              | 2.95                            |
| 12 H520 averaged   | 15,896                  | 3,201                                                   | 1%                | 3.87                            |

**Table S4.**
